# Supplementary material for: Cost burden of type 2 diabetes in Germany: results from the population-based KORA studies
Source: PubMed Central journal article supplement — BMJ Open. 2016 Nov 21;6(11):e012527. doi: 10.1136/bmjopen-2016-012527 (PMC5129071; doi:10.1136/bmjopen-2016-012527), 2016-11-21
Supplement: bmjopen-2016-012527supp_appendix1.pdf [file bmjopen-2016-012527supp_appendix1.pdf]

**Appendix 1: Overview on unit costs for resource utilization and productivity losses**

|                |                                                                                                                                                     |                                   |
|----------------|-----------------------------------------------------------------------------------------------------------------------------------------------------|-----------------------------------|
| Physician      | general physician                                                                                                                                   | 20.06 €/ contact                  |
|                | internist                                                                                                                                           | 65.44 €/ contact                  |
|                | gynecologist                                                                                                                                        | 30.13 €/ contact                  |
|                | surgeon                                                                                                                                             | 43.39 €/ contact                  |
|                | orthopedist                                                                                                                                         | 25.42 €/ contact                  |
|                | urologist                                                                                                                                           | 24.70 €/ contact                  |
|                | ear, nose and throat specialist                                                                                                                     | 26.40 €/ contact                  |
|                | ophthalmologist                                                                                                                                     | 34.78 €/ contact                  |
|                | dermatologist                                                                                                                                       | 18.89 €/ contact                  |
|                | neurologist                                                                                                                                         | 44.72 €/ contact                  |
|                | psychotherapist                                                                                                                                     | 78.08 €/ contact                  |
|                | other outpatient physician contacts                                                                                                                 | 40.06 €/ contact                  |
|                | dentist                                                                                                                                             | 55.87 €/ contact                  |
| Hospital       | outpatient                                                                                                                                          | 40.06 €/ contact                  |
|                | inpatient                                                                                                                                           | 593.04€/ day                      |
| Rehabilitation | outpatient                                                                                                                                          | 37.48 €/ day                      |
|                | inpatient                                                                                                                                           | 121.85 €/ day                     |
| Medication     | pharmacy retail prices from the Scientific Institute of the AOK health care insurance based on pharmaceutical identification number and dosage [25] |                                   |
| Indirect costs | early retirement                                                                                                                                    | 36,103 €/ year <sup>34</sup>      |
|                | sick leave days                                                                                                                                     | 170.86 €/ day * <sup>34, 35</sup> |

\* €36,103 divided by the number of effective working days (211.3 days)
