# Supplementary material for: Cost burden of type 2 diabetes in Germany: results from the population-based KORA studies
Source: PubMed Central journal article supplement — BMJ Open. 2016 Nov 21;6(11):e012527. doi: 10.1136/bmjopen-2016-012527 (PMC5129071; doi:10.1136/bmjopen-2016-012527), 2016-11-21
Supplement: bmjopen-2016-012527supp_appendix2.pdf [file bmjopen-2016-012527supp_appendix2.pdf]

**Appendix 2:** Annual direct per capita costs related to severity or treatment in individuals with type 2 diabetes

|                   |                      | <b>Ratio ‡</b> | <b>95%-CI</b> |
|-------------------|----------------------|----------------|---------------|
| Sex               | women                | reference      |               |
|                   | men                  | 0.98           | [0.77 - 1.23] |
| Age               | [years]              | 1.01           | [1.00 - 1.02] |
| Weight            | [BMI]                | 1.03           | [1.00 - 1.06] |
| Education         | primary              | reference      |               |
|                   | secondary            | 1.39           | [0.97 - 1.99] |
|                   | tertiary             | 0.94           | [0.63 - 1.41] |
| Treatment         | no medication        | reference      |               |
|                   | with OAD only        | 1.12           | [0.79 - 1.59] |
|                   | with OAD and insulin | 1.69           | [1.08 - 2.66] |
|                   | with insulin only    | 2.16           | [1.30 - 3.58] |
| Diabetes duration | 0-2 years            | reference      |               |
|                   | 3-10 years           | 0.84           | [0.57 - 1.24] |
|                   | 11-19 years          | 1.12           | [0.73 - 1.74] |
|                   | ≥ 20 years           | 1.70           | [0.93 - 3.12] |
| Glycemic control  | HbA1c <6.5%          | reference      |               |
|                   | HbA1c 6.5%-7.5%      | 0.78           | [0.59 - 1.03] |
|                   | HbA1c 7.5%-9%        | 0.76           | [0.55 - 1.05] |
|                   | HbA1c >9%            | 1.02           | [0.60 - 1.74] |
| CVD complications | no CVD complications | reference      |               |
|                   | CVD complications    | 1.45           | [1.14 - 1.86] |

GEE models with a gamma distribution and a log link. Models based on 9,160 observations from 6,803 subjects. 1€ was assigned to observations with zero costs. Models are accounted for the repeated measurement structure.

Missing values on BMI, treatment, diabetes duration, glycemic control and complications (in total n=126) were imputed using a regression based imputation method

‡ exponentiated estimate

OAD: oral antidiabetic drugs

\*\* Significant at the level of 1%.

\* Significant at the level of 5%.
